# Supplementary material for: Modulation of double-network hydrogels via seeding calcium carbonate microparticles for the engineering of ultrasensitive wearable sensors
Source: Royal Society of Chemistry journal article supplement (doi:10.1039/d2ta07834a), 2023-01-01
Supplement: d2ta07834a1.pdf [file d2ta07834a1.pdf]

## Supporting information

### Modulation of Double-Network Hydrogels via Seeding Calcium Carbonate Microparticles for the Engineering of Ultrasensitive Wearable Sensors

Xiaohui Zhang,<sup>a</sup> Huimin Geng,<sup>a</sup> Xunhui Zhang,<sup>a</sup> Yaqing Liu,<sup>a</sup> Jingcheng Hao,<sup>\*a</sup> and Jiwei Cui<sup>\*a,b</sup>

<sup>a</sup>Key Laboratory of Colloid and Interface Chemistry of the Ministry of Education, School of Chemistry and Chemical Engineering, Shandong University, Jinan, Shandong 250100, China;

<sup>b</sup>State Key Laboratory of Microbial Technology, Shandong University, Qingdao, Shandong 266237, China

Email: [jhao@sdu.edu.cn](mailto:jhao@sdu.edu.cn); [jwcui@sdu.edu.cn](mailto:jwcui@sdu.edu.cn)

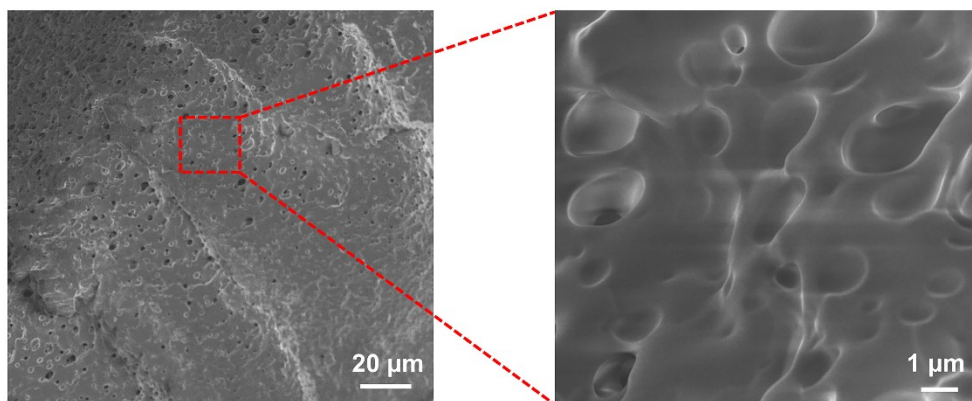

**Fig. S1** SEM images of PAM hydrogels.

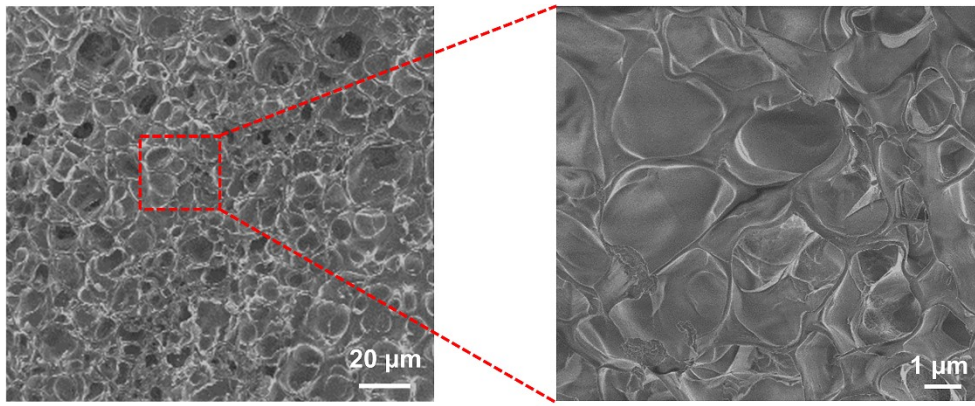

**Fig. S2** SEM images of SA/PAM hydrogels.

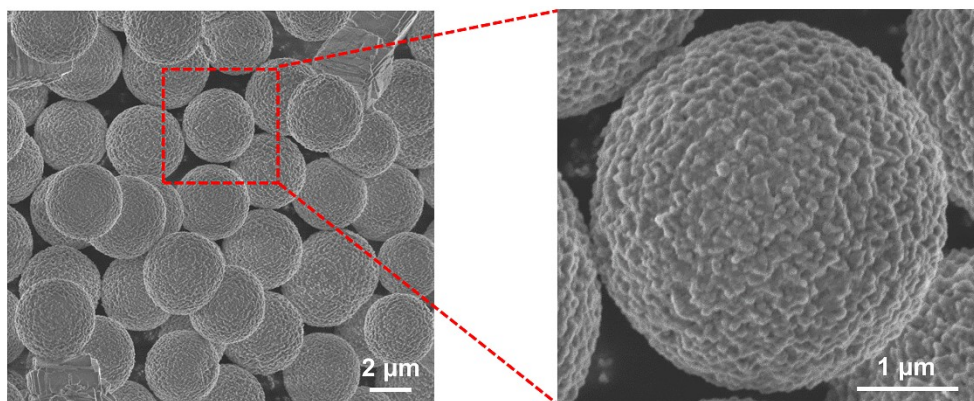

**Fig. S3** SEM images of CaCO<sub>3</sub> microparticles.

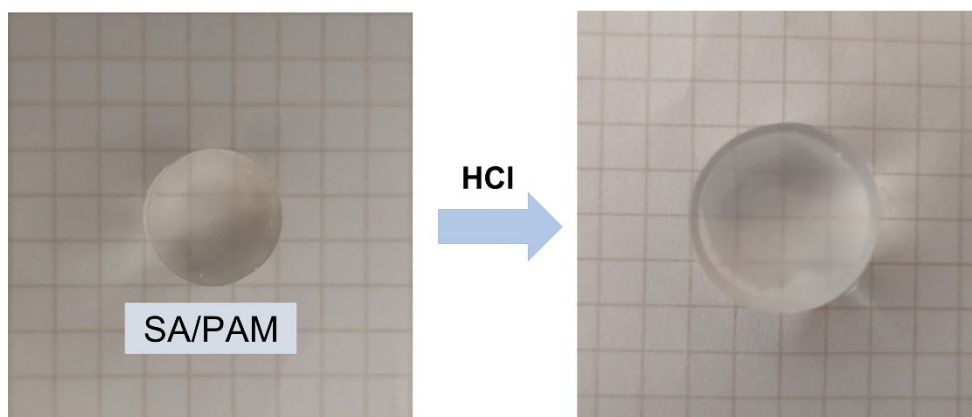

**Fig. S4** Photographs of the SA/PAM hydrogel before and after the trigger with HCl.

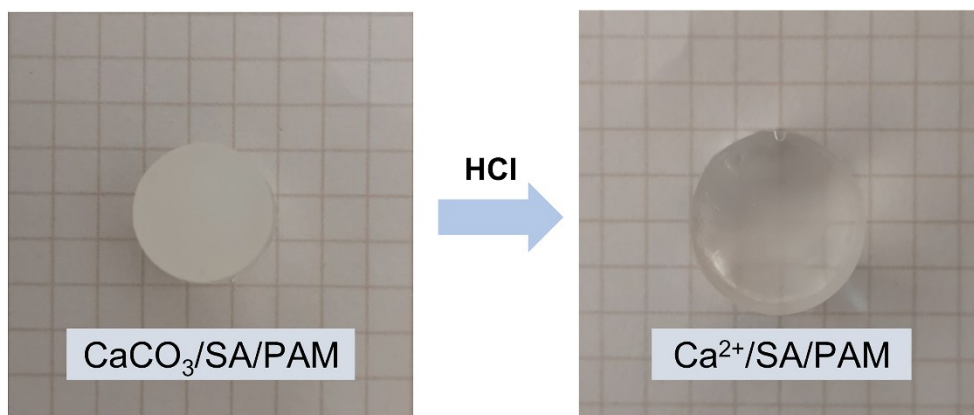

**Fig. S5** Photographs of the CaCO<sub>3</sub>/SA/PAM and Ca<sup>2+</sup>/SA/PAM hydrogels after the trigger with HCl.

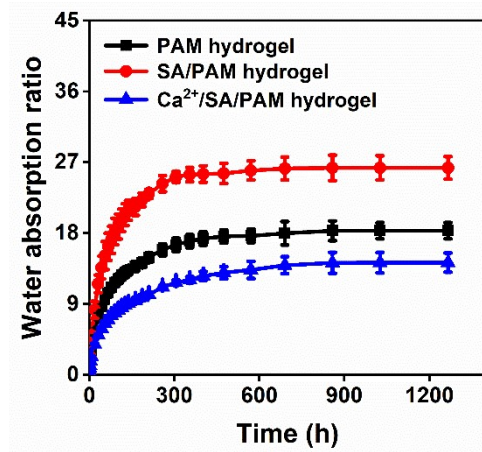

**Fig. S6** Water absorption ratio of PAM hydrogels, SA/PAM hydrogels, and Ca<sup>2+</sup>/SA/PAM DN hydrogels in water.

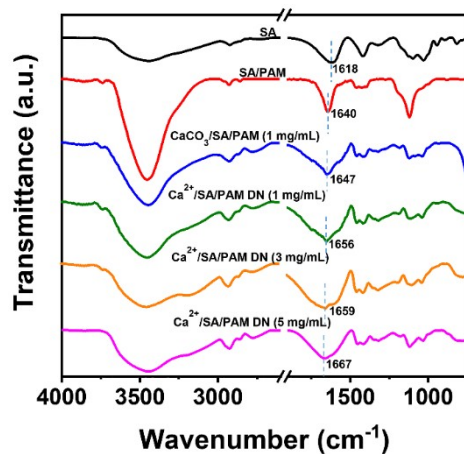

**Fig. S7** FTIR spectra of SA powder, SA/PAM, CaCO<sub>3</sub>/SA/PAM and Ca<sup>2+</sup>/SA/PAM DN (at various concentrations of CaCO<sub>3</sub> microparticles, 1–5 mg mL<sup>-1</sup>) hydrogels.



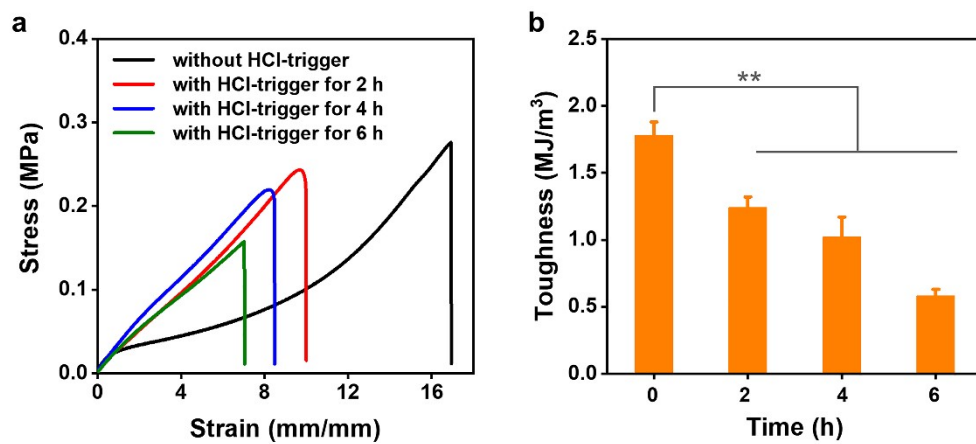

**Fig. S8** (a) Tensile stress–strain curves and (b) corresponding toughness of SA/PAM hydrogels after trigger with HCl for different time.

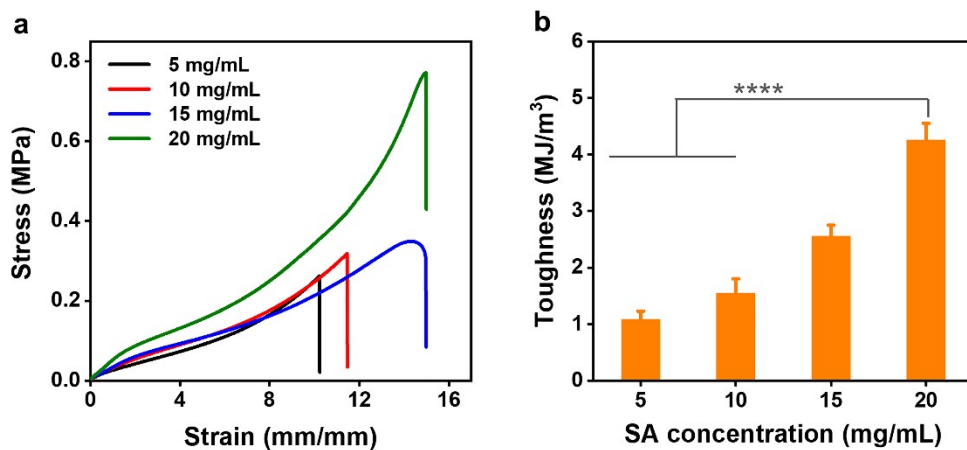

**Fig. S9** (a) Tensile stress-strain curves and (b) corresponding toughness of  $\text{Ca}^{2+}$ /SA/PAM DN hydrogels at various concentrations of SA (the concentration of AM and MBAA were 320 and 0.2 mg mL<sup>-1</sup>, respectively).

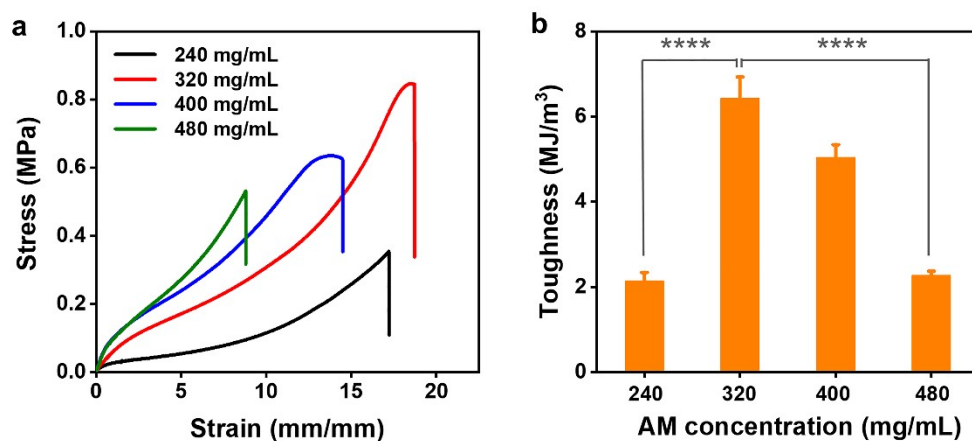

**Fig. S10** (a) Tensile stress-strain curves and (b) corresponding toughness of Ca<sup>2+</sup>/SA/PAM DN hydrogels at various concentrations of AM (the concentration of SA and MBAA were 20 and 0.2 mg mL<sup>-1</sup>, respectively).

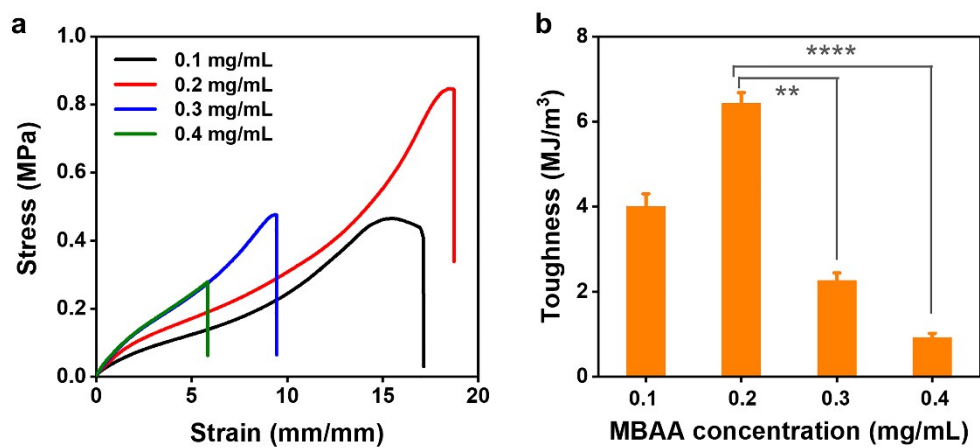

**Fig. S11** (a) Tensile stress-strain curves and (b) corresponding toughness of Ca<sup>2+</sup>/SA/PAM DN hydrogels at various concentrations of MBAA (the concentration of SA and AM were 20 and 320 mg mL<sup>-1</sup>, respectively).

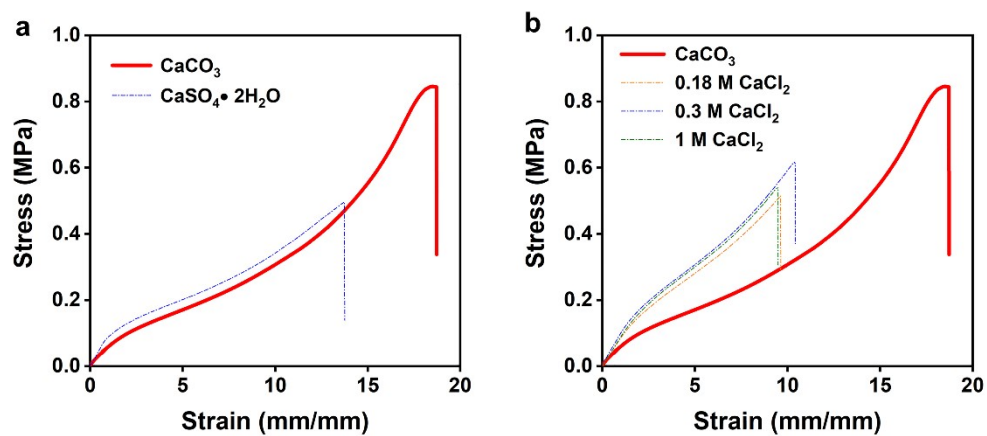

**Fig. S12** (a) Comparison of  $\text{Ca}^{2+}$ /SA/PAM DN and  $\text{CaSO}_4$ /SA/PAM hydrogels with the same quantity of  $\text{Ca}^{2+}$ . (b) Comparison of  $\text{Ca}^{2+}$ /SA/PAM DN and  $\text{CaCl}_2$ /SA/PAM hydrogels at different concentrations of  $\text{CaCl}_2$ .

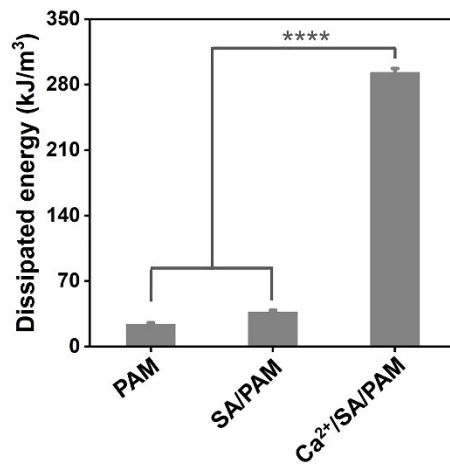

**Fig. S13** The corresponding dissipated energy of PAM, SA/PAM, and Ca<sup>2+</sup>/SA/PAM DN hydrogels under 500% strain by loading-unloading tests.

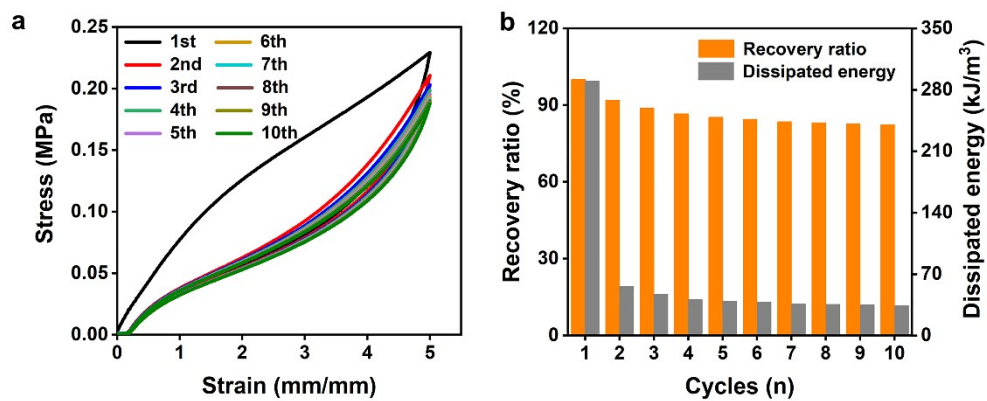

**Fig. S14** (a) Stress-strain curves and (b) calculated recovery ratio and dissipated energy of Ca<sup>2+</sup>/SA/PAM DN hydrogels with successive loading-unloading tests under 500% strain for 10 cycles.

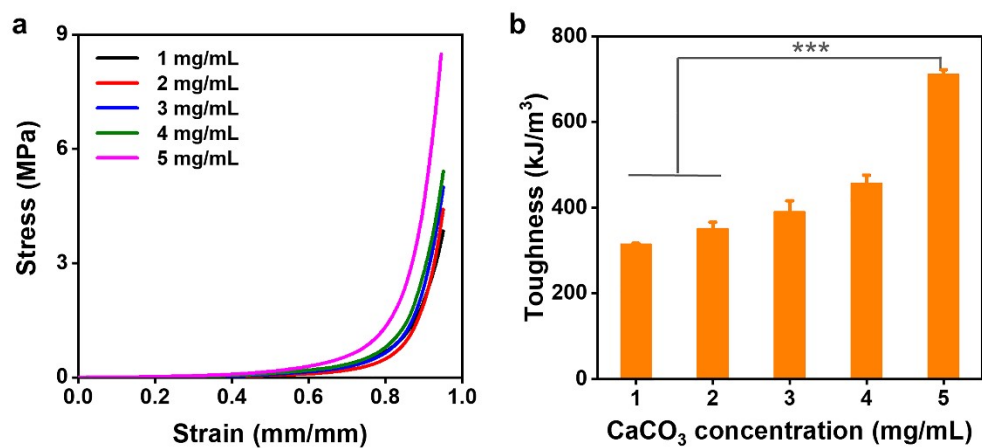

**Fig. S15** (a) Stress-strain curves from compression tests and (b) toughness of Ca<sup>2+</sup>/SA/PAM DN hydrogels at various concentrations of CaCO<sub>3</sub> microparticles.



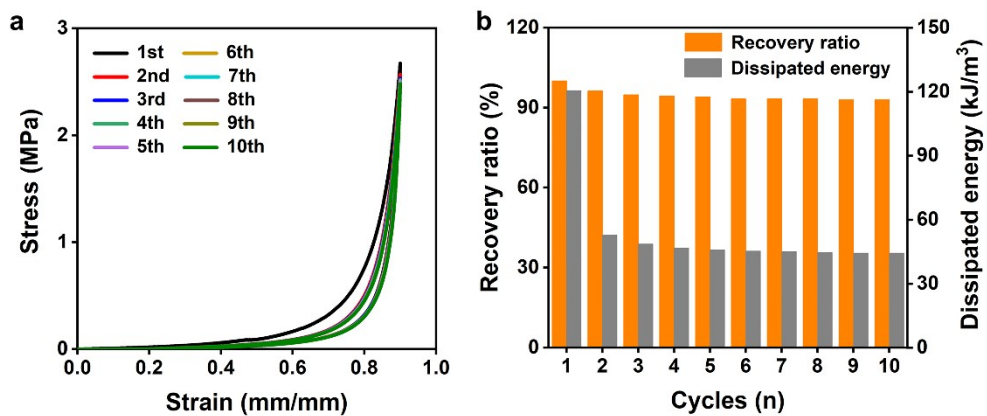

**Fig. S16** (a) Loading-unloading tests and (b) calculated recovery ratio and dissipated energy of Ca<sup>2+</sup>/SA/PAM DN hydrogels under 90% strain for 10 cycles without resting intervals.

**Table S1. Summary of recent hydrogel-based flexible sensors.**

| Materials                          | Tensile property |                | Conductivity<br>(S/m) | Gauge factor | Detection range<br>$\epsilon$ (%) | Response time<br>(ms) | References |
|------------------------------------|------------------|----------------|-----------------------|--------------|-----------------------------------|-----------------------|------------|
|                                    | $\sigma$ (MPa)   | $\epsilon$ (%) |                       |              |                                   |                       |            |
| CNF/CS/PAM                         | 0.29             | 691            | 0.68                  | 3.13         | 50-200                            | 520                   | 1          |
| CNF/CS/P(AM-co-AA)                 | 11               | 480            | 2.2                   | /            | /                                 | /                     | 2          |
| ZnSO <sub>4</sub> /SA/PAM          | 0.15             | 700            | 3.24                  | /            | /                                 | /                     | 3          |
| NaCl/SA/PAM                        | 0.65             | 2000           | 0.06                  | 2.66         | 0.3-1800                          | /                     | 4          |
| F127-CHO/ MWCNT/P(AM-co-AEMA)/LiCl | 0.15             | 1205           | 3.96                  | 2.32         | 930                               | /                     | 5          |
| LMs/GelMA                          | 0.15             | 150            | /                     | 48           | 150                               | 50                    | 6          |
| Starch/PAM                         | 0.06             | 135            | 0.13                  | 0.98         | /                                 | /                     | 7          |
| PAA-r-BVIT/PEO                     | 0.039            | 321            | 0.036                 | 1.1          | 50-200                            | 80                    | 8          |
| AP/P(AA-co-AM)/KCl                 | 0.2              | 1089           | 0.17                  | 8.82         | /                                 | 100                   | 9          |
| LMA/PAM/PNIPAM/LiCl                | 0.96             | 1866           | /                     | 7.57         | 0.25-1500                         | 197                   | 10         |
| HPMC-g-AN/AM-ZnCl <sub>2</sub>     | 0.16             | 1730           | 1.54                  | 0.94         | /                                 | /                     | 11         |
| PVA/P(SBMA-co-HEMA)                | 0.376            | 337            | 4.58                  | 3.36         | 1-300                             | 130                   | 12         |
| PAM/[EMIM]Cl                       | 0.023            | 1160           | 3.87                  | 6.78         | 50-800                            | /                     | 13         |
| CMC/PAM/LiCl                       | 0.023            | 1363           | /                     | 3.15         | 100-500                           | 360                   | 14         |

|                                           |             |             |             |             |                  |           |                  |
|-------------------------------------------|-------------|-------------|-------------|-------------|------------------|-----------|------------------|
| CA/PAM/Li <sub>2</sub> SO <sub>4</sub>    | 0.225       | 2800        | /           | 9.6         | /                | /         | 15               |
| P(AM-APBA)/NaCl                           | 0.21        | 1600        | 4.8         | 8           | 2.5-200          | 380       | 16               |
| PAA/PANI NFs                              | 0.036       | 991         | /           | 18.28       | 5-268.9          | /         | 17               |
| PAA/ACC/Mxene                             | 0.18        | 450         | /           | 10.79       | 0.3-90           | 20        | 18               |
| EDTANa <sub>2</sub> Ca/SA/P(SBMA-co-HEMA) | 0.294       | 975         | 0.39        | 3.26        | /                | /         | 19               |
| MEA/AA/Graphene                           | 0.175       | 1080        | 0.012       | 3.40        | 0.2-500          | /         | 20               |
| HLPs/P(AAm-co-LMA)/LiCl                   | 1.37        | 2058        | 1.79        | 5.44        | 0.25-2000        | 151       | 21               |
| PAM/CS-PA                                 | 0.150       | 1350        | 10.5        | 10.87       | 0.1-1000         | 291       | 22               |
| <b>Ca<sup>2+</sup>/SA/PAM DN</b>          | <b>0.85</b> | <b>1850</b> | <b>0.85</b> | <b>8.91</b> | <b>0.03-1800</b> | <b>20</b> | <b>This work</b> |

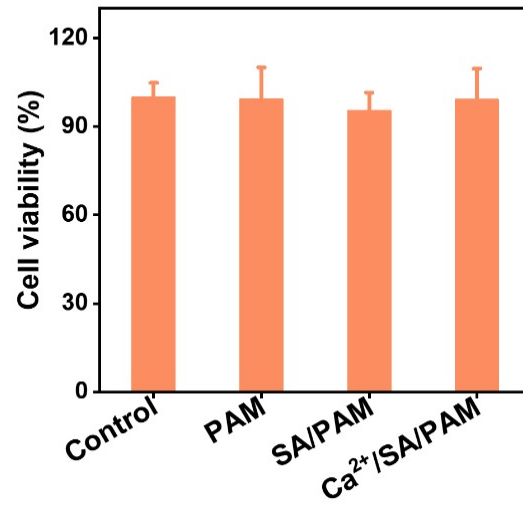

**Fig. S17** Viability of NIH-3T3 cells after incubation with PAM, SA/PAM, or Ca<sup>2+</sup>/SA/PAM hydrogel extracts for 24 h.

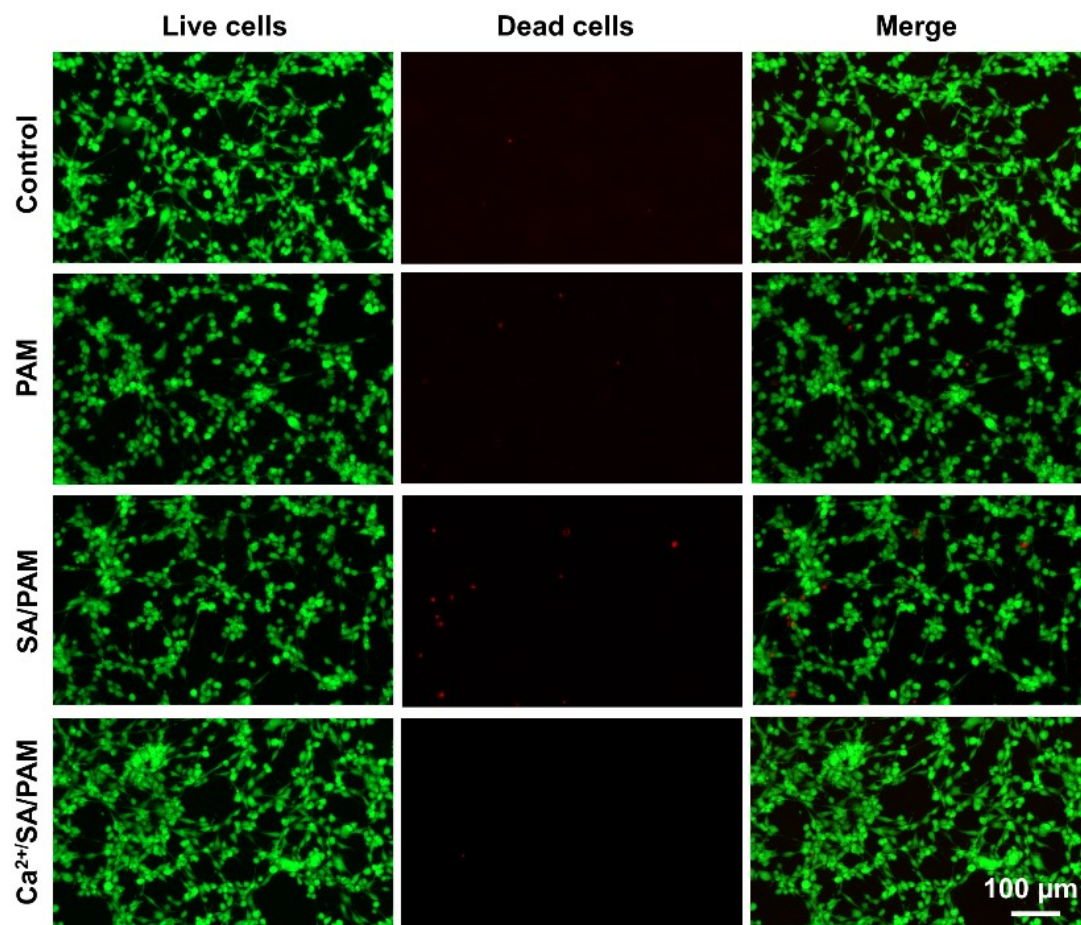

**Fig. S18** Fluorescence microscopy images of live/dead NIH-3T3 cells after incubation with PAM, SA/PAM, or Ca<sup>2+</sup>/SA/PAM hydrogel extracts for 24 h.

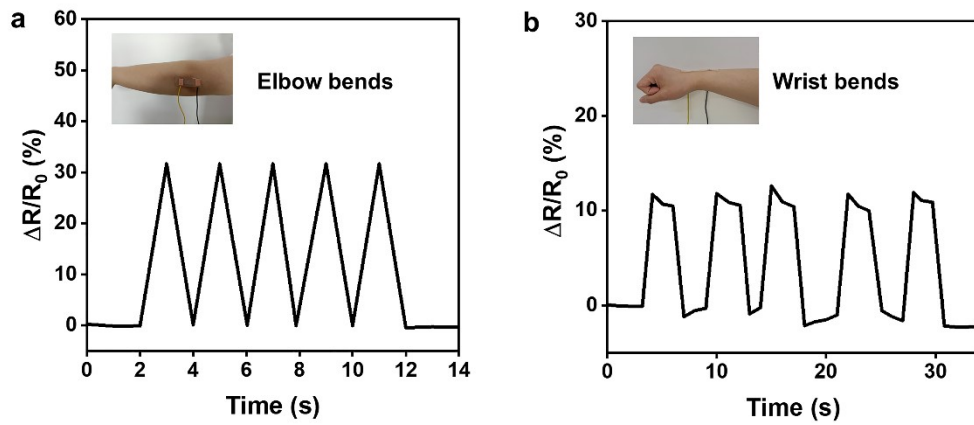

**Fig. S19** Electrical resistance from the flexion and extension of (a) elbow and (b) wrist.

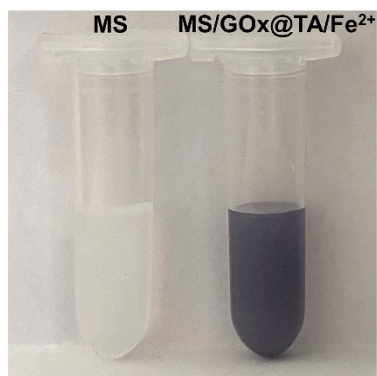

**Fig. S20** Photographs of MS and MS/GOx@TA/Fe<sup>2+</sup> NPs suspension.

Incubation of MS NPs with glucose oxidase (GOx), followed by coating with tannic acid (TA) and ferrous glycinat (Fe[Gly]<sub>2</sub>), resulted in color changes of the MS suspensions, which indicated the successful preparation of the MS/GOx@TA/Fe<sup>2+</sup> NPs.

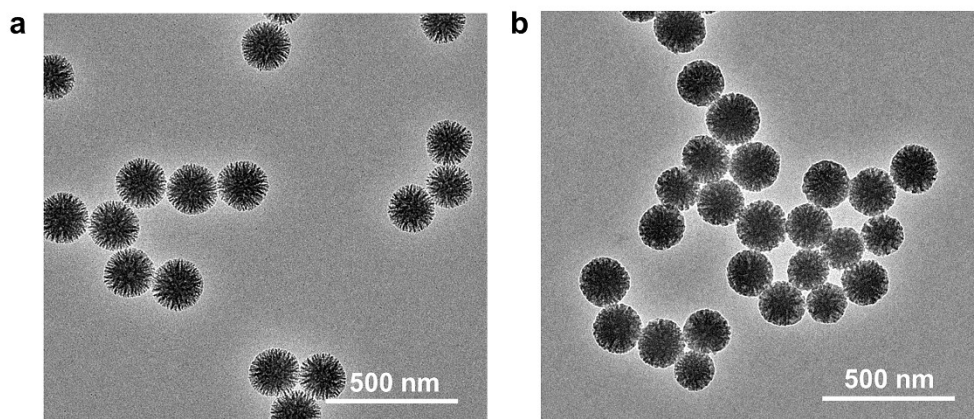

**Fig. S21** TEM images of (a) MS NPs and (b) MS/GOx@TA/Fe<sup>2+</sup> NPs with an average size of 175 nm.



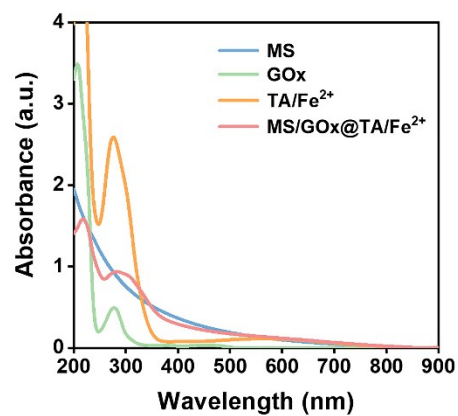

**Fig. S22** UV-vis absorption spectra of MS NPs, GOx, TA/Fe<sup>2+</sup> and MS/GOx@TA/Fe<sup>2+</sup> NPs, respectively.

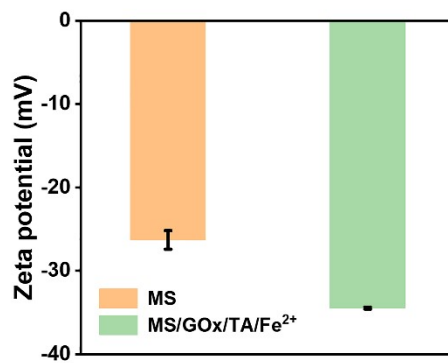

**Fig. S23** Zeta potential of MS and MS/GOx@TA/Fe<sup>2+</sup> NPs.

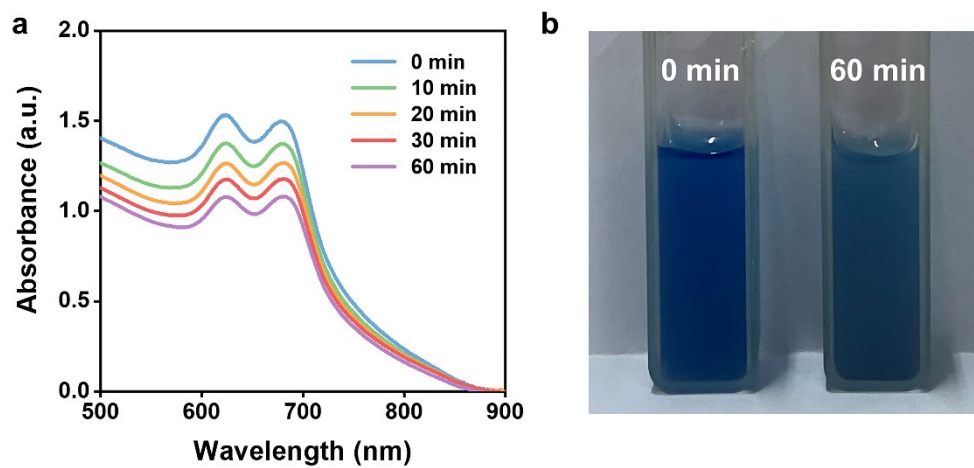

**Fig. S24** UV-vis absorption spectra (a) and optical photograph (b) of solutions containing MB, glucose, and MS/GOx@TA/Fe<sup>2+</sup> NPs at different time points.

## References

1. J. Yu, Y. Feng, D. Sun, W. Ren, C. Shao and R. Sun, *ACS Appl. Mater. Interfaces*, 2022, **14**, 10886–10897.
2. L. Geng, S. Hu, M. Cui, J. Wu, A. Huang, S. Shi and X. Peng, *Carbohydr. Polym.*, 2021, **262**, 117936.
3. F. Mo, Y. Huang, Q. Li, Z. Wang, R. Jiang, W. Gai and C. Zhi, *Adv. Funct. Mater.*, 2021, **31**, 2010830.
4. X. Zhang, N. Sheng, L. Wang, Y. Tan, C. Liu, Y. Xia, Z. Nie and K. Sui, *Mater. Horiz.*, 2019, **6**, 326–333.
5. M. Wu, J. Chen, Y. Ma, B. Yan, M. Pan, Q. Peng, W. Wang, L. Han, J. Liu and H. Zeng, *J. Mater. Chem. A*, 2020, **8**, 24718–24733.
6. X. Yuan, P. Wu, Q. Gao, J. Xu, B. Guo and Y. He, *Mater. Horiz.*, 2022, **9**, 961–972.
7. S. Zeng, J. Zhang, G. Zu and J. Huang, *Carbohydr. Polym.*, 2021, **267**, 118198.
8. A. Wang, Y. Wang, B. Zhang, K. Wan, J. Zhu, J. Xu, C. Zhang and T. Liu, *Chem. Eng. J.*, 2021, **411**, 128506.
9. H. Zhou, J. Lai, B. Zheng, X. Jin, G. Zhao, H. Liu, W. Chen, A. Ma, X. Li and Y. Wu, *Adv. Funct. Mater.*, 2021, **32**, 2108423.
10. Q. Liang, X. Xia, X. Sun, D. Yu, X. Huang, G. Han, S. M. Mugo, W. Chen and Q. Zhang, *Adv. Sci.*, 2022, **9**, 2201059.
11. D. Chen, X. Zhao, X. Wei, J. Zhang, D. Wang, H. Lu and P. Jia, *ACS Appl. Mater. Interfaces*, 2020, **12**, 53247–53256.
12. J. Ren, Y. Liu, Z. Wang, S. Chen, Y. Ma, H. Wei and S. Lü, *Adv. Funct. Mater.*, 2021, **32**, 2107404.
13. M. Ma, Y. Shang, H. Shen, W. Li and Q. Wang, *Chem. Eng. J.*, 2021, **420**, 129865.
14. T. Zhu, Y. Cheng, C. Cao, J. Mao, L. Li, J. Huang, S. Gao, X. Dong, Z. Chen and Y. Lai, *Chem. Eng. J.*, 2020, **385**, 123912.
15. J. Chen, L. Zhang, Y. Tu, Q. Zhang, F. Peng, W. Zeng, M. Zhang and X. Tao, *Nano Energy*, 2021, **88**, 106272.
16. K. Xu, K. Shen, J. Yu, Y. Yang, Y. Wei, P. Lin, Q. Zhang, C. Xiao, Y. Zhang and Y. Cheng, *Chem. Mater.*, 2022, **34**, 3311–3322.

17. G. Ge, Y. Lu, X. Qu, W. Zhao, Y. Ren, W. Wang, Q. Wang, W. Huang and X. Dong, *ACS Nano*, 2020, **14**, 218–228.
18. X. Li, L. He, Y. Li, M. Chao, M. Li, P. Wan and L. Zhang, *ACS Nano*, 2021, **15**, 7765–7773.
19. H. Wei, Z. Wang, H. Zhang, Y. Huang, Z. Wang, Y. Zhou, B. B. Xu, S. Halila and J. Chen, *Chem. Mater.*, 2021, **33**, 6731–6742.
20. X. Liu, Q. Zhang and G. Gao, *ACS Nano*, 2020, **14**, 13709–13717.
21. S. Xia, Q. Zhang, S. Song, L. Duan and G. Gao, *Chem. Mater.*, 2019, **31**, 9522–9531.
22. Q. Zhang, X. Liu, J. Zhang, L. Duan and G. Gao, *J. Mater. Chem. A*, 2021, **9**, 22615–22625.
